# Supplementary material for: Design synthesis of a controllable flower-like Pt-graphene oxide architecture through electrostatic self-assembly for DNA damage biomarker 8-hydroxy-2′-deoxyguanosine biosensing research
Source: Royal Society of Chemistry journal article supplement (doi:10.1039/c8an00698a), 2018-01-01
Supplement: c8an00698a1.pdf [file c8an00698a1.pdf]

*Supporting information for*

**Design synthesis of controllable flower-like Pt-graphene  
oxide architecture through electrostatic self-assembly for  
DNA damage biomarker-8-Hydroxy-2'-deoxyguanosine  
biosensing research**

Qiuyue Zhao, Qi Zhang, Yuena Sun, Yuexian Liu, Haijun Lu, Xinyu Fan, Haiyang Wang, Yufan Zhang\* and Huan Wang\*

Key Laboratory of Analytical Science and Technology of Hebei Province, College of Chemistry and Environmental Science, Key Laboratory of Medicinal Chemistry and Molecular Diagnosis, Ministry of Education, Hebei University, 071002 Baoding, P. R. China.

Email: zwhsjzl@163.com (H.Wang)  
Fax: +86-0312-5079403  
Tel.: +86-0312-5079403

## Table of contents

|           | Page |
|-----------|------|
| Fig.S1    | S3   |
| Fig.S2    | S3   |
| Fig.S3    | S4   |
| Scheme S1 | S4   |
| Table S1  | S5   |

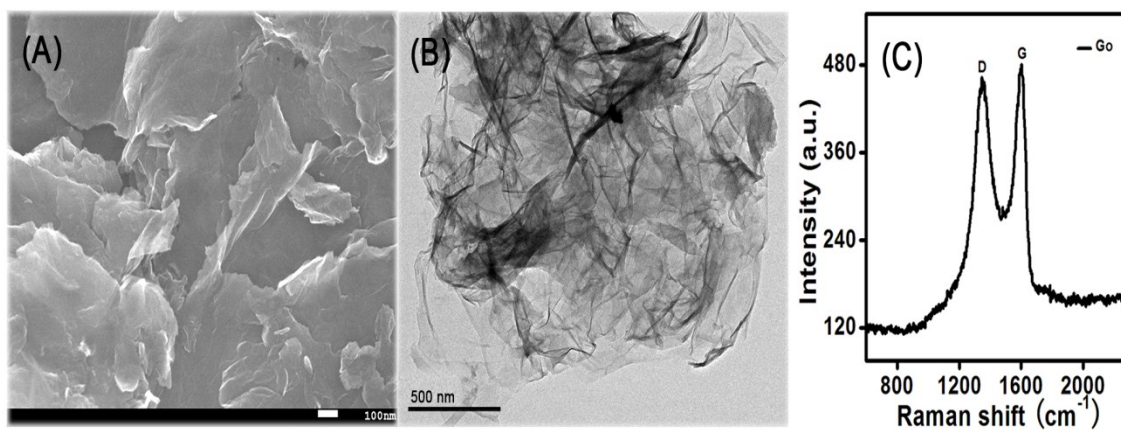

**Fig.S1** (A) SEM image of GO. (B) TEM image of GO. (C) Raman spectra of GO.

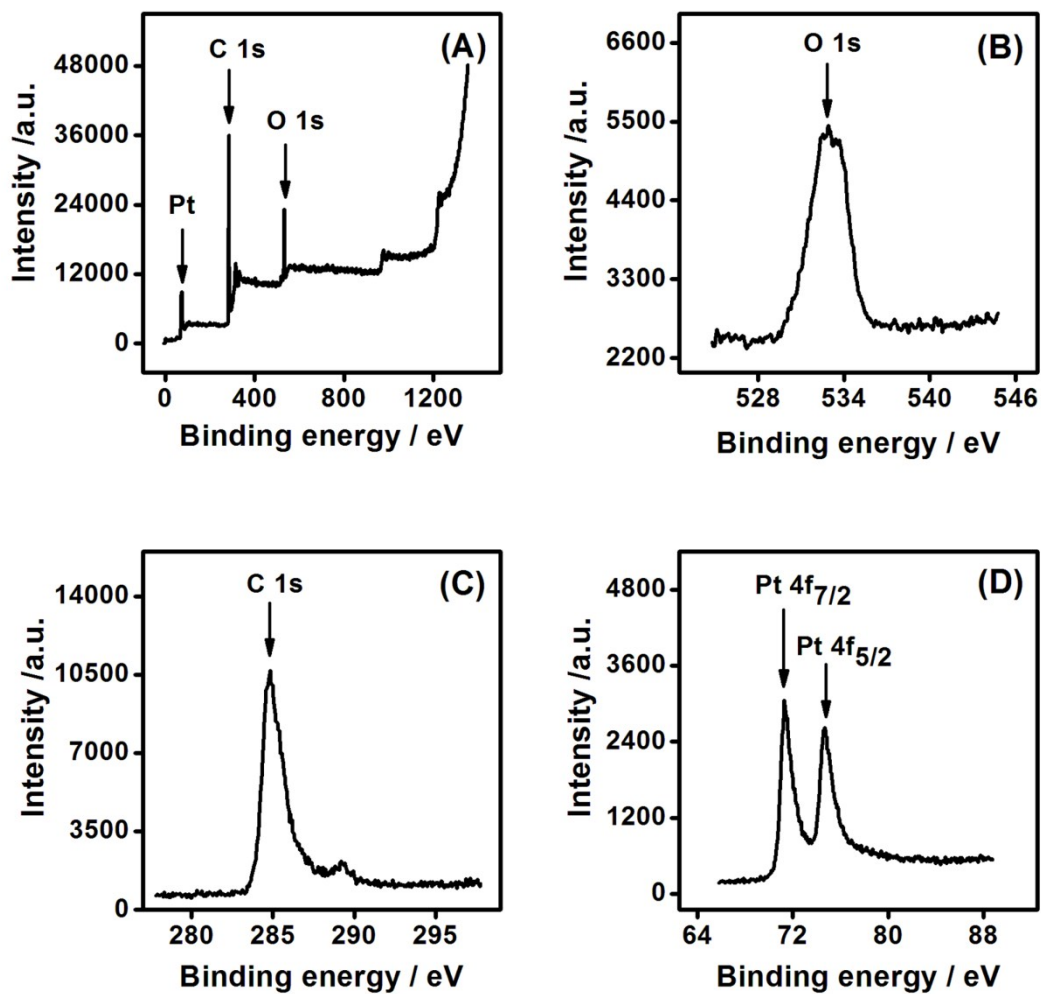

**Fig.S2** (A) XPS spectra of PtNFs-GO-1. (B), (C), (D) High resolution O 1s, N 1s and Pt 4f XPS spectra of PtNFs-GO-1.

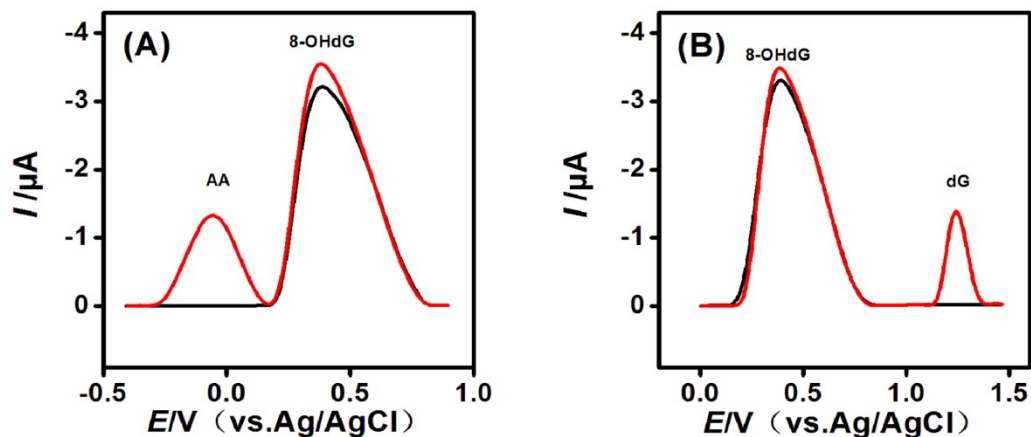

**Fig.S3** (A) DPVs for 10  $\mu\text{M}$  8-OHdG at PtNFs-GO-1/GCE (black line) in 0.1 M PBS (PH 7.4), DPVs for 60  $\mu\text{M}$  AA and 10  $\mu\text{M}$  8-OHdG at PtNFs-GO-1/GCE (red line) in 0.1 M PBS (PH 7.4). (B) DPVs for 10  $\mu\text{M}$  8-OHdG at PtNFs-GO-1/GCE (black line) in 0.1 M PBS (PH 7.4), DPVs for 15  $\mu\text{M}$  dG and 10  $\mu\text{M}$  8-OHdG at PtNFs-GO-1/GCE (red line) in 0.1 M PBS (PH 7.4). Scan rate: 100  $\text{mVs}^{-1}$ . Pulse amplitude: 0.025 V. Pulse width: 0.05 V. Pulse period: 0.05 s.

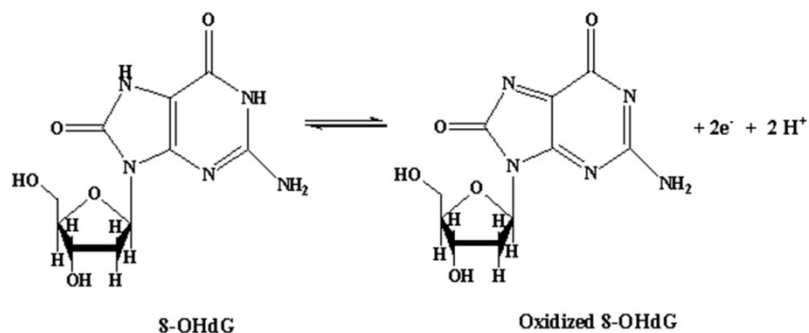

**Scheme S1** The electrochemical oxidation of 8-OHdG belongs to a two-electron two-proton process.

**Table S1** Comparison of the electrocatalytic performance of different electrodes for 8-OHdG biosensing.

| Electrodes        | Linear range ( $\mu\text{M}$ ) | sensitivity ( $\mu\text{A}/\mu\text{M}$ ) | Detection limit (nM) | Reference |
|-------------------|--------------------------------|-------------------------------------------|----------------------|-----------|
| P3MT/GCE          | 0.7–35.0                       | 0.361                                     | 100.0                | [39]      |
| SWCNT-Lysine /GCE | 0.3–10.0                       | 15.90                                     | 97.0                 | [22]      |
| MWCNT/ErGO/GCE    | 3.0–75.0                       | 0.197                                     | 35.0                 | [41]      |
| EPPG              | 1.0–100                        | 1.069                                     | 28.0                 | [43]      |
| MWCNTs/GCE        | 0.056–6.08                     | 3.309                                     | 11.8                 | [44]      |
| MIP/EPPG          | 0.02–3.00                      | 10.59                                     | 3.00                 | [45]      |
| PtNFs-GO-1/GCE    | 0.0007–2.00                    | 1.1630                                    | 0.025                | This      |
|                   | 2.0–22                         | 0.0681                                    | 600.0                | Work      |
